# Supplementary material for: Camel regulates development of the brain ventricular system
Source: PubMed Central journal article supplement (PMC7904751; doi:10.1007/s00441-020-03270-1), 2020-09-09
Supplement: 441_2020_3270_MOESM1_ESM.pdf [file 441_2020_3270_MOESM1_ESM.pdf]

**A**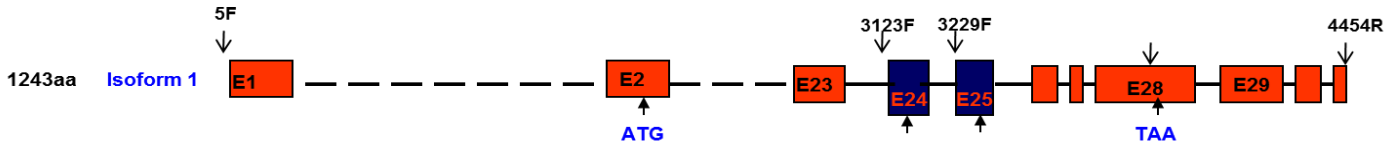

primers            1-cell    6h    12h    24h    48h    72h    144h

**B**

5F-2R

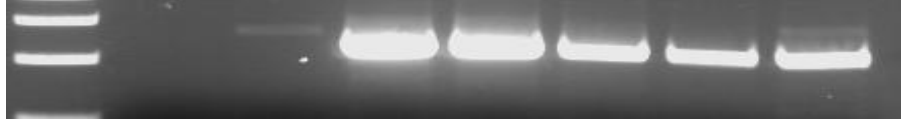**C**

159F-2R

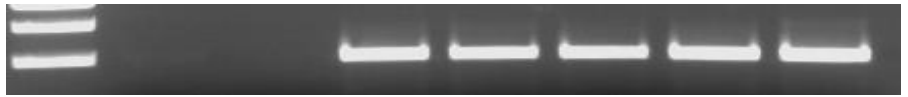**D**

3438F-1R

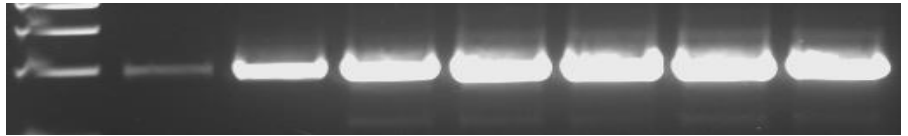**E**

3035F-1R

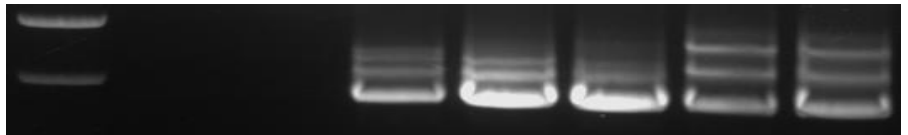**F**

isoF-isoR

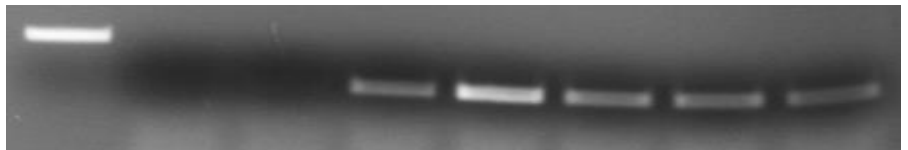**G**

elf-1α

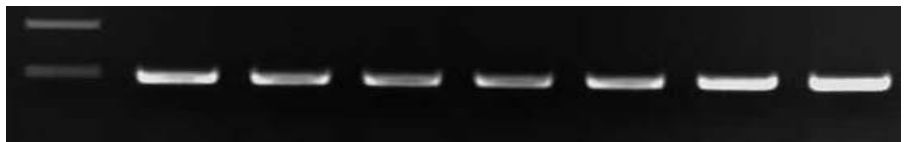

Suppl. Fig.1.

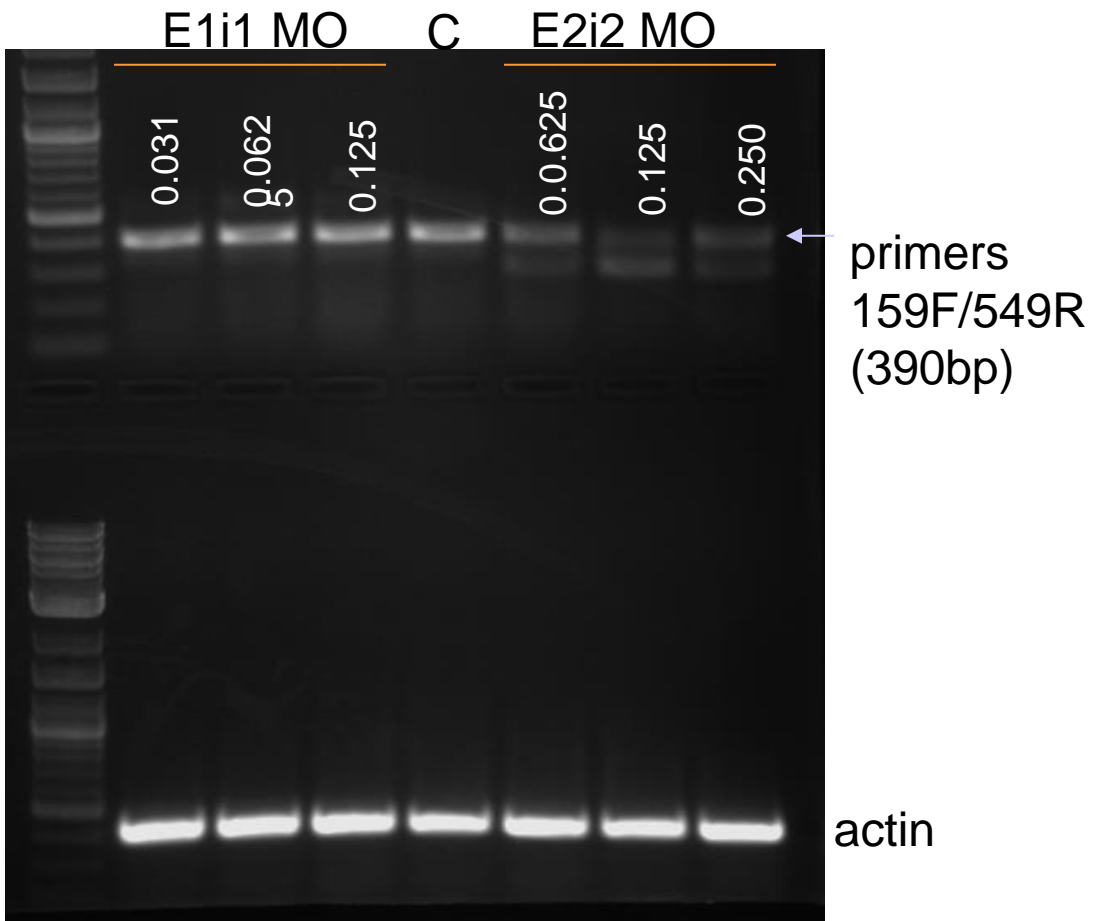

Suppl. Fig. 2.
