# Supplementary material for: Camel regulates development of the brain ventricular system
Source: PubMed Central journal article supplement (PMC7904751; doi:10.1007/s00441-020-03270-1), 2020-09-09
Supplement: 441_2020_3270_MOESM3_ESM.pdf [file 441_2020_3270_MOESM3_ESM.pdf]

---

**primers:**

1F: 5'-TCTCTGAAGGAGTCGGTAAG -3'

1R: 5'-TAGTCCTGCTGATCCTGTCAA -3'

2R: 5'-TGCACATCTTACCATGCTGA -3'

5F: 5'-TGCTCATCTCTTCTGACAGGA -3'

3599R: 5'-TTGGGCCACTGTTAAGAAGTTC- 3'

3599R-XbaI: 5' **TGCTCTAGAT**TTGGGCCACTGTTAAGAAGTTC -3'

3987R: 5'-AAGAACGGATTCCTGGAGTCA -3'

3564F: 5'-TGGACATACCCAGGAACTTC- 3'

3438F: 5'- TGATCGCAGTGAGGATAGCTC -3'

518R: 5'-AACTTGGGTACCATAGGCACA -3'

159F: 5' -GAGCATATCCTTCATCTTTCTC- 3'

106F: 5'- TCATCTTTCTCTGGCTGGGAT- 3'

106F-ClaI: 5'-**CCATCGAT**TCATCTTTCTCTGGCTGGGAT- 3'

78F: 5' -TCCTGACGAGTGTTTTGAGCA- 3'

656R: 5'- CTCTCATTCTGCTCAATGTGC -3'

911F: 5'-AGCTGGAGTGATTGCAGAAG -3'

1661R: 5'-AGTTCAGTGGTGATGCTTGCA -3'

1425F: 5'-TCTGGAGTATGCAACCATGTTG -3'

2028F: 5'-GAACACCAGTGATCACAACAG -3'

2585F: 5'-AGGTGTTGAACTCTACACTGC -3'

2816F: 5'-ACCGGAGAGGGAATGGGC -3'

2990F: 5'-ACCAAACAGTTGTAGATAATGAG-3'

3009F: 5'-TGAGACTCTGGGTGAGCTGAA-3'

3035F: 5'-TGAACATCTCTGGAGCAGACA- 3'

ISO10-F: 5'-TGCAGCATTCTGCTCAACGT- 3'

ISO10-R: 5'-TGCTAGAAGCTTTCCTGGTCT -3'

ISOuni10-R: 5'-CAGATACCATCACGGTGGTTC- 3'

ISO8-F: 5'-ATGAACCACCGTGATGGTATC -3'

---

4394R: 5'-GAAGAACGGATTCCTGGACTC-3'

4369R: 5'-GATGTGCTAAAGGCTGCATTC-3'

4333R: 5'-TGGACCTGTCATGTCAGAAGC-3'

4298R: 5'-ACTCATGGCTGAGCAGAAGCA-3'

4263R: 5'-TGTACCTGGCATTTAGTGACC-3'

pE23E25-F: 5'-CTGCAGCATGTGATGGTATCT-3'

pE26E24-R: 5'-GTCTGCTAGAAGGGTGGTTCA-3'

3009F: 5'-TGAGACTCTGGGTGAGCTGAA-3'

2953F: 5'-GAAACCAACGGCCATCTCACAG-3'

3025F: 5'-CTGAACTCTGTGAACATCTCTGGA-3'

3426R: 5'-CTCTTCAAAAATGCTAGGGACACC-3'

3271R: 5'-AACAGCCGATGAGGACAAGCA-3'

# The DNA sequence of camel isoforms

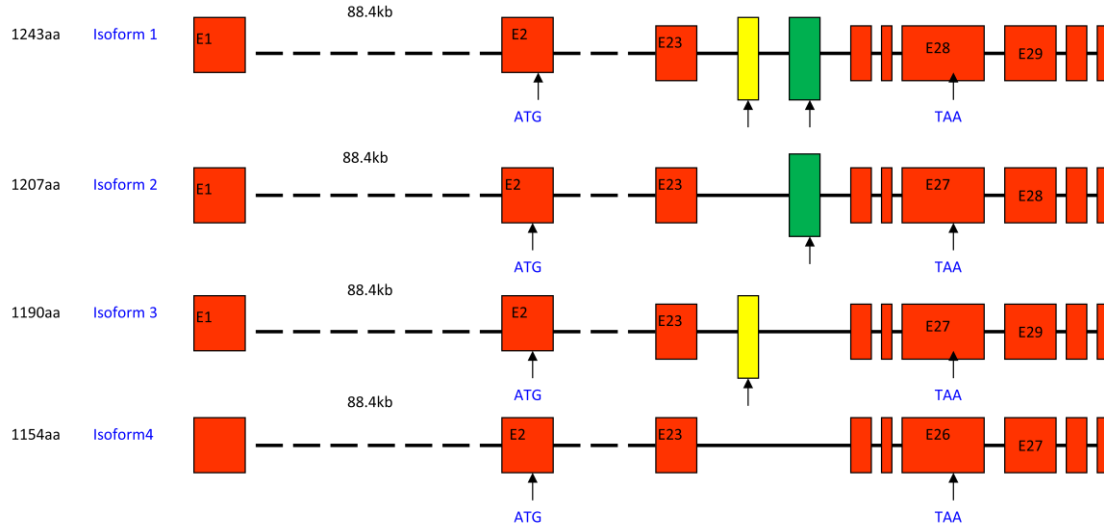

## Isoform 1 cDNA sequence

ATTCTGCTCATCTCTTCTGACAGGAGCTTAACGCCGACTTAAATCAGATCTTTCTCTTGAAGGAGTCGG  
 TAAGAAGCTCCTGACGAGTGTTTTGAGCATATCCTTCATCTTTCTCTGGCTGGG**ATGAGGGGGCTCAG**  
**GAGTCTAGTGTGGGCTCTGTTCGGCCTTCTTCCACCACCTTTGGTCTTTATTTCCCTCCTCACGT**  
**GGAGCAGCTGCCACCATCACCGCTCAGACCTCAGGCACTATCATCGCCCTACCATATGATGAGCGAT**  
**ACATATTC AAGTGTGAAGCCAAAGGAAACCAAGACCTACGTTCCGCTGGACAAAAGATGGGATG**  
**GATTTTGACCCACATAAAGACCCTCAGGTCCTACAGAAAGAAAATACTGGAACCTTTGAGATACCA**  
**AATAAAAAAGATAAAGTGAATACCAGGGAAAGTACAGATGTTACGCCTCCAACAAACTCGGAAC**  
**TGCAACTTCAGAAGAAGCCGAATTTATTGTGCCTATGGTACCCAAGTTTCCAAGGAGAAGATAGA**  
**GCCAATTGTGGTCACAGAGGGTGATTCCGGTGGTTTTGGAGTGTAACCCGCCACAAGGGATTCCACC**  
**CTGGCAGCTGTACTGGATGACCAATGATCTCCGGCACATTGAGCAGAATGAGAGGGTGTCCATGGG**  
**CCTCAGTGGGAATCTGTACTTCTAATACGCTGGTGTGACAGTCATGATGACTACTGCTGCTTCG**  
**CCTCCTTTTCAAAAATACGCACAATCGTCCAGAAACCCCGCATGGTCTCAAGGTCAAGCCAGTTGA**  
**TGCAAAGCAAGAGGATGGTGATGCCAAGATTGTTCCAGGAGAGGAAGCCAAGCATCTTGTTCCCT**  
**CCAGTCATTCAACGACTTTCCTGAAAAAAGGAGAAGAGCTGGAGCTGGAGTGTATTGCAGAAGGA**  
**CTGCCTACCCGGAGGTAGAATGGATCAAGATATGGGGTGACTTACCAAAGCGCACGCAGATAAAG**  
**AACTTCGAAAGCTTCTGACAATACCAAACATCAGAGAAGAGGACGAAGGAAAATACATGTGTAA**  
**AGCCAAGAATCAGCATGGTGAAGATGTGCATCATTTCCAGGTCGAAGTAGAGGAGCCACCGAGCT**  
**GGCAGAAGGAGCCGCTGAAGAGTCAGTTAGCATGGATTGGATCTGACATCCACATCAACTGTTCTG**  
**CTACCCGAAAACCGCAACCCACAATCACCTGGAAAAGAAACGGCAAGCCCCTCGATGATTTCCCTT**  
**CCACCCATCACAAAATGCTTGACGACAGAATAATCATACTCAAAGCGGAGCAGAAAAGATACCGCTG**  
**TGTACCAGTGTGAGGCCTCCAACAAACACGGCAGCCTACTGGCCAATGCTAATGTGCTAGTCATGAA**  
**TCACCTCCTTTGATTCTGACGAGGAATTATCTGGAGTATGCAACCATGTTGGGCAAGAGTGTGATT**  
**ATGGACTGCAATGTCTTTAGTTCACCACCTGCCACCCTAACTGGAGAAGAGAAGACCCAGAGGGC**  
**TCTGTAGATGGAGAGAGATATTCTCTGCTGAAGAATGGCTCCCTGCAGATTCACAAAGTCGAGATG**  
**GAAGATATGGGCCAGTACAAATGCTTGGCAAACAACTCCGAGGGCTCTGCAAGCATCACCCTGAA**

---

CTTTTCATTAAAGATTCCACTAGGATCGTGGAGGCTCCTCAAGACATGAAGGTCATCCGGGGATCTG  
TGGCCGAGCTGGAGTGCCAGGTGGAGTGGACCCGTCTCTGAGAAGAGAGCTGGAGTTCGTTTG  
GCTCAAAGATGGGATAAATATCCTCTCGAACTCCTCAGAAAGGTATTTTACAGATGAAGGAATTCTT  
CAGATATTCAACGTGAGTCACAGTGATCAAGGAATTACACCTGTATTGTTTGAACATCCCTGGACC  
AAGATACAGCTTCTGCATACATAACAGTCTTAGATGTCCCCGATCCTCCGGTTGAATTATTGCTCAGT  
GATCTGAAAGACCCGAGTGTGAAGTCCACTGGGTGAACACCAGTGATCACAACAGTCCATAACA  
GAGTTCATCATCCAGTACGAAGAGAGCCACTGGGAGCCAGAGAAGTGGAAGATCTTCTTCGAGT  
GTCTAGCAGGAAGTTCTCAGCCCCCTGGCTCTGTAAGTCCACATTAATACTACCAGTTCAGAGTCATCG  
CTGTCAATGAAATAGGGAGAAGTCATCCAGTATGCCCTCAGGAAGATATAAAACACCTCCATGTGC  
TCCTGACAGGAACCCAGAAAACATTAAGATTGAGGGTCACTGCCACATCAGATGGACATCAGCTG  
GGAGCCGCTCTTGCCGGTGGAGCACAACGGTCCCGGTCTGGAATACAACTGAGCTACAGGCTCCT  
GGGTGTCGAGGACAGTTGGAAGAGCAGATGGTAAAGAGACACTCTTTTGTGGTGCAGACACC  
CCGACATTGTCCTTATGAAGTCAAATCCAGGCCTTCAACCGCCACGGCTGGGCACCAGGACCC  
AAAGTGGTACTGTTTATTCTGGGAAGACTTGCCTTGGTGGTCCCGATAACGTATCTGCGGAG  
GTGTTGAACTCTACTGCTGAAGGTGAGTGGTACCAGTGCCCCAACCCACCTGAGGGGCCAT  
CTTGAGGATACACAGTGAATACTGGCAAACCTCAGAGTCTGTTGACCTTAAGAAAATTCCCTCA  
GAGAGACAGTCTCTACCATCCCTGAAACAGGAGTACACCATGGTGCCAGGACTGAAACCATT  
TCTGAATATAGTCTGACTGTCAACGTCTTAACCGGAGAGGAATGGGCCCAAGCAGCAGTCCCA  
TCTCTTTCACAACTCCACAAGGGAGTTCCTGAACAACCTCATAACCTGAAAGCCACAACTTTCAGA  
AAGACGCCATCACACTGGTGTGGGCGCCTCCGCACGAAACCAACGGCCATCTCACAGGATACCTTC  
TGCAATACCAAACAGTTGTAGATAATGAGACTCTGGGTGAGTGAACCTGTGAACATCTCTGGAG  
CAGACACGACACAGTGGGTTTTGCGTGATCTGCAGGAAGACAACCTCATATAAGTTCTACTGAGTG  
CGTGACGCAGGTGGGCTGTGGGTGAGCCATCAGTGAGAAAGGAGGCCACCGACCTGCAGCATTC  
GTGCTCAACGTATCGACCTTGTAAAGAGACTTCTGCAAGAATCAGCTGGAGAACCAGAGGAGA  
GCATTGAGATTCACAGCTCTATGTTGCTATAATGAACCACCGTGTGATGTTCTGGCAGCTTTCAGAG  
CTTTAAATACATCTAAAGGTTTCCATCTGGTTGAAGGACTCAGCCCAGGAAGTGTGTACACAGTCCG  
GCTGCAGGCTTACGCAGGGTTGGTGTCCCTAGCATTCTTGAAGAGGTTTCAAGACCAGGAAAG  
CTTCTAGCAGACAAGAGATGGGATCTCAGGAGTGGTTTGTGGGGATGATGTGCGCGGTGGCTTTG  
CTAACTCTGCTTGTCTCATCGGCTGTTTTGTGCTCAAGAACAAGGTGGCAAATACGCAGTAAAGG  
AAAAGGAGAACATCCAGCTGATCCTGAATCTCATGGCATGGATGAAGAAACACCCTGTGAATACA  
GTGACAATGATGAGAAGCCGCTGAAGAGCAGCCAGCAATTGTTCCGAGACGCCACAGAGGATGAT  
CGCAGTGAGGATAGCTCTGAGATATCAGAGGATGATGACTGCGAGTTCAATGAAGATGGGTCATTC  
ATTGGTGAATACTCTGGGTACATGCGCAGGACGTCCACGGCGGTCAACGGATTGAATGGACATACC  
CCAGGAACTTCTTAAAGTGGCCCAATTTTATGAACCTTTTAAACAATTCAACAGTAAGAAAGTTTT  
GTTTGAATGGTGTGCCATGAATGTGCCTATGCTTCTGCGTGATTGGGCCAGTTTTTCTACAGTATTAATA  
TGAAGGTTGAAAATTTATGATTCTGCGCAACACAAAACAACCTGTTTCAAACCTTTGAGTTTTTTAAGC  
AAAACCTTTTATGCTACTTTTTCCATTCAATTAATAAAAAA

### Isoform 2 cDNA sequece

ATTCTGCTCATCTCTTCTGACAGGAGCTTAAACGCCGACTTAAATCAGATCTTTCTTGAAGGAGTCGG  
TAAGAAGCTCCTGACGAGTGTGTTGAGCATATCCTTCATCTTCTCTGGCTGGGATGAGGGGGCTCAG  
GAGTCTCAGTGTGGGCTCTGTGCGCCTTCTTCCACCACCTTTGGTCTTTATTTCCCTCCTCACGT  
GGAGCAGCTGCCACCATCACCGCTCAGACCTCAGGCACTATCATCGCCCTACCATATGATGAGCGAT  
ACATATTCAAGTGTGAAGCCAAAGGAAACCAAGACCTACGTTCCGCTGGACAAAAGATGGGATG

---

GATTTTGACCCACATAAAGACCCTCAGGTCACTACAGAAGAAAATACTGGAACCTTTGAGATACCA  
AATAAAAAAGATAAAGTGAAATACCAGGGAAAGTACAGATGTTACGCCTCCAACAACTCGGAAC  
TGCAACTTCAGAAGAAGCCGAATTTATTGTGCCTATGGTACCCAAGTTTCCAAGGAGAAGATAGA  
GCCAATTGTGGTCACAGAGGGTGATTTCGGTGGTTTTGGAGTGTAACCCGCCACAAGGGATTCCACC  
CTGGCAGCTGTACTGGATGACCAATGATCTCCGGCACATTGAGCAGAATGAGAGGGTGTCCATGGG  
CCTCAGTGGGAATCTGTACTTCTAATACGCTGGTGTGACACAGTCATGACTACTGCTGCTCG  
CCTCCTTCTTCAAATACGCACAATCGTCCAGAAACCCCGCATGGTCCTCAAGGTCAAGCCAGTTGA  
TGCAAAGCAAGAGGATGGTGTGATGCCAAGATTGTTTCAGGAGAGGAAGCCAAGCATCTTGTTCCCT  
CCAGTCATTCAACGACTTTCCTGAAAAAGGAGAAGAGCTGGAGCTGGAGTGTATTGCAGAAGGA  
CTGCCTACACCGGAGGTAGAATGGATCAAGATATGGGGTGACTTACCAAAGCGCACGCAGATAAAG  
AACTTCGAAAAGCTTCTGACAATACCAAACATCAGAGAAGAGGACGAAGGAAAATACATGTGTAA  
AGCCAAGAATCAGCATGGTGAAGATGTGCATCATTCCAGGTGAAGTAGAGGAGCCACCGAGCT  
GGCAGAAGGAGCCGCTGAAGAGTCAGTTAGCATGGATTGGATCTGACATCCACATCAACTGTTCTG  
CTACCGGAAAACCGCAACCCACAATCACCTGGAAAAGAAACGGCAAGCCCCTCGATGATTTCCCTT  
CCACCCATCACAAAATGCTTGACGACAGAATAATCATACTCAAAGCGGAGCAGAAAAGATACCGCTG  
TGTACCAGTGTGAGGCCTCCAACAAACACGGCAGCCTACTGGCCAATGCTAATGTGCTAGTCATGAA  
TCACCCCTCTTTGATTCTGACGAGGAATTATCTGGAGTATGCAACCATGTTGGGCAAGAGTGTGATT  
ATGGACTGCAATGTCTTTAGTTCACCACCTGCCACCCTAACTGGAGAAGAGAAGACCCAGAGGGC  
TCTGTAGATGGAGAGAGATATTCTGCTGAAGAATGGCTCCCTGCAGATTCACAAAGTCGAGATG  
GAAGATATGGGCCAGTACAAATGCTTGGCAAACAACCTCCGAGGGCTCTGCAAGCATCACCCTGAA  
CTTTTCATTAAAGATTCCACTAGGATCGTGGAGGCTCCTCAAGACATGAAGGTATCCGGGGATCTG  
TGGCCGAGCTGGAGTGCCAGGTGGAGTGCACCCGTCTCTGAGAAGAGAGCTGGAGTTCGTTTG  
GCTCAAAGATGGGATAAATATCCTCTCGAACTCCTCAGAAAGGTATTTTACAGATGAAGGAATCTT  
CAGATATTCAACGTGAGTCACAGTGATCAAGGGAATTACACCTGTATTGTTTGAACATCCCTGGACC  
AAGATACAGCTTCTGCATACATAACAGTCTTAGATGTCCCCGATCCTCCGGTTGAATTATTGCTCAGT  
GATCTGAAAGACCGCAGTGTGAAGTCCACTGGGTGAACACCAGTGATCACAACAGTCCATAACA  
GAGTTCATCATCCAGTACGAAGAGAGCCACTGGGAGCCAGAGAAGTGGAAGATCTTCTTCGAGT  
GTCTAGCAGGAAGTTCTCAGCCCCCTGGCTGTACTGCCACATTAATACTACCAGTTCAGAGTCATCG  
CTGTCAATGAAATAGGGAGAAGTCATCCCAGTATGCCCTCAGGAAGATATAAAACACCTCCATGTGC  
TCCTGACAGGAACCCAGAAAACATTAAGATTGAGGGTCACTGCCACATCAGATGGACATCAGCTG  
GGAGCCGCTCTTGCCGGTGGAGCACAACGGTCCCGGTCTGGAATACAACTGAGCTACAGGCTCCT  
GGGTGTCGAGGACAGTTGGAAGAGCAGATGGTAAAGAGACACTCTTTTGTGGTGCAGACACC  
CCGACATTGTCCTTATGAAGTCAAATCCAGGCCTTCAACCGCCACGGCTGGGACCCAGGACCC  
AAAGTGGTGACTGGTTATTCTGGGAAGACTTGCCCTTGGTGGCTCCCGATAACGTATCTGCGGAG  
GTGTTGAACTCTACTGCTGAAGGTGAGCTGGTACCAGTGCCCCAAACCACCTGAGGGGCCAT  
CTTGGAGGATACACAGTGAATACTGGCAAACCTCAGAGTCTGTTGACCTTAAGAAAATTCCTCA  
GAGAGACAGTCTCTACCATCCCTGAAACAGGAGTCACACCATGGTGCCAGGACTGAAACCATT  
TCTGAATATAGTCTGACTGTCAACGTCTTAAACCGGAGAGGGAATGGGCCCAAGCAGCAGTCCCA  
TCTCTTTCACAACTCCACAAGGGAGTTCCTGAACAACCTCATAACCTGAAAGCCACAACTTTCAGA  
AAGACGCCATCACACTGGTGTGGGCGCCTCCGCACGAAACCAACGGCCATCTCACAGGATACCTT  
TGCAATACCAAACAGTTGTAGATAATGAGACTCTGGGTGAGCTGAACTCTGTGAACATCTCTGGAG  
CAGACACGACACAGTGGGTTTTGCGTGATCTGCAGGAAGACAACCTCATATAAGTTCTACCTGAGTG  
CGTGACGCAGGTGGGCTGTGGGTGAGCCATCAGTGAGAAAGGAGGACCCGACCTGCAGCATGT  
GATGGTATCTGGCAGCTTTCAGAGGCTTAAATACATCTAAAGGTTCCATCTGGTTGAAGGACTCA

---

GCCAGGAACTGTGTACACAGTCCGGCTGCAGGCTTACGCAGGGTTGGTGTCCCTAGCATTTTG  
AAGAGGTTTCAAGACCAGGAAAAGCTTCTAGCAGACAAGAGATGGGATCTCAGGAGTGGTTTGTG  
GGGATGATGTGCGCGGTGGCTTTGCTAACTCTGCTTGTCTCATCGGCTGTTTTGTGCTCAAGAACA  
AAGGTGGCAAATACGCAGTAAAGGAAAAGGAGAACATTCCAGCTGATCCTGAATCTCATGGCATG  
GATGAAGAAACACCCTGTGAATACAGTGACAATGATGAGAAGCCGCTGAAGAGCAGCCAGCAATT  
GTTCCGAGACGCCACAGAGGATGATCGCAGTGAGGATAGCTCTGAGATATCAGAGGATGATGACTG  
CGAGTTCAATGAAGATGGGTCATTATTGGTGAATACTCTGGGTACATGCGCAGGACGTCCACGGC  
GGTCAACGGATTGAATGGACATACCCAGGAACTTCTTAA CAGTGGCCCAATTTTATGAACTTTTAA  
ACAATTCAACAGTAAGAAAGGTTTTGTTGAATGGTGTGCCATGAATGTGCCTATGCTTCTGCGTGATT  
GGGCCAGTTTTTCTACAGTATTAATATGAAGTTGAAAATTTATGATTCTGCGCAACACAA

### Isoform 3 cDNA sequence

ATTCTGCTCATCTCTTCTGACAGGAGCTTAAACGCCGACTTAAATCAGATCTTTCTTGAAGGAGTCGG  
TAAGAAGCTCCTGACGAGTGGTTTGAGCATATCCTTCATCTTTCTCTGGCTGGGATGAGGGGGCTCAG  
GAGTCTCAGTGTGGGCTCTGTGCGCCTTCTTCCACCACCTTTGGTCTTTATTTCCCTCCTCACGT  
GGAGCAGCTGCCACCATCACCGCTCAGACCTCAGGCACTATCATCGCCCTACCATATGATGAGCGAT  
ACATATTCAAGTGTGAAGCAAAGGAAACCAAGACCTACGTTCCGCTGGACAAAAGATGGGATG  
GATTTTGACCCACATAAAGACCCTCAGGTCACTACAGAAGAAAATACTGGAACCTTTGAGATACCA  
AATAAAAAAGATAAAGTGAATACCAGGGAAAGTACAGATGTTACGCCTCCAACAAACTCGGAAC  
TGCAACTTCAGAAGAAGCCGAATTTATTGTGCCTATGGTACCAAGTTTCCAAGGAGAAGATAGA  
GCCAATTGTGGTCACAGAGGGTGATTCCGGTGGTTTTGGAGTGTAACCCGCCACAAGGGATTCCACC  
CTGGCAGCTGTACTGGATGACCAATGATCTCCGGCACATTGAGCAGAATGAGAGGGTGTCCATGGG  
CCTCAGTGGGAATCTGTACTTCTAATACGCTGGTGTGACAGTCATGATGACTACTGCTGCTTCG  
CCTCCTTCTTCAAATAACGCACAATCGTCCAGAAACCCGCATGGTCCCAAGGTCAAGCCAGTTGA  
TGCAAAGCAAGAGGATGGTGTGATGCAAGATTGTTACAGGAGAGGAAGCAAGCATCTTGGTTCCT  
CCAGTCATTCAACGACTTTCCTGAAAAAAGGAGAAGAGCTGGAGCTGGAGTGATTGCAGAAGGA  
CTGCCTACACCGGAGGTAGAATGGATCAAGATATGGGGTGACTTACCAAAGCGCACGCAGATAAAG  
AACTTCGGAAAGCTTCTGACAATACCAAACATCAGAGAAGAGGACGAAGGAAAATACATGTGTAA  
AGCCAAGAATCAGCATGGTGAAGATGTGCATCATTTCCAGGTCGAAGTAGAGGAGCCACCGAGCT  
GGCAGAAGGAGCCGCTGAAGAGTCAGTTAGCATGGATTGGATCTGACATCCACATCAACTGTTCTG  
CTACCGGAAAACCGCAACCCACAATCACCTGGAAAAGAAACGGCAAGCCCTCGATGATTTCCCTT  
CCACCCATCACAAAATGCTTGACGACAGAATAATCATACTCAAAGCGGAGCAGAAAAGATACCGCTG  
TGTACCAGTGTGAGGCCTCCAACAAACACGGCAGCCTACTGGCCAATGCTAATGTGCTAGTCATGAA  
TCACCTCCTTTGATTCTGACGAGGAATTATCTGGAGTATGCAACCATGTTGGGCAAGAGTGTGATT  
ATGGACTGCAATGTCTTTAGTTCACCACCTGCCACCCTTAACTGGAGAAGAGAAGACCCAGAGGGC  
TCTGTAGATGGAGAGAGATATTCTCTGCTGAAGAATGGCTCCCTGCAGATTCACAAAGTCGAGATG  
GAAGATATGGCCAGTACAAATGCTTGGCAAACAACCTCCGAGGGCTCTGCAAGCATCACCCTGAA  
CTTTTCATTAAAGATTCCACTAGGATCGTGGAGGCTCCTCAAGACATGAAGGTCATCCGGGGATCTG  
TGGCCGAGCTGGAGTGCCAGGTGGAGTGCACCCGCTCTCTGAGAAGAGAGCTGGAGTTCGTTTG  
GCTCAAAGATGGGATAAATATCCTCTCGAACTCCTCAGAAAGGTATTTTACAGATGAAGGAATTCTT  
CAGATATTCAACGTGAGTCACAGTGATCAAGGGAATTACACCTGTATTGTTGCAACATCCCTGGACC  
AAGATACAGCTTCTGCATACATAACAGTCTTAGATGTCCCCGATCCTCCGGTTGAATTATTGCTCAGT  
GATCTGAAAGACCGCAGTGTGAAGCTCCACTGGGTGAACACCAGTGATCACAACAGTCCATAACA  
GAGTTCATCATCCAGTACGAAGAGAGCCACTGGGAGCCAGAGAAGTGGAAGATCTTCTTCGAGT



---

AGCCAAGAATCAGCATGGTGAAGATGTGCATCATTTCCAGGTCGAAGTAGAGGAGCCACCGAGCT  
GGCAGAAGGAGCCGCTGAAGAGTCAGTTAGCATGGATTGGATCTGACATCCACATCAACTGTTCTG  
CTACCGGAAAACCGCAACCCACAATCACCTGGAAAAGAAACGGCAAGCCCCTCGATGATTTCCCTT  
CCACCCATCACAAAATGCTTGACGACAGAATAATCATACTCAAAGCGGAGCAGAAAGATACCGCTG  
TGTACCAGTGTGAGGCCTCCAACAAACACGGCAGCCTACTGGCCAATGCTAATGTGCTAGTCATGAA  
TCACCTCCTTTGATTCTGACGAGGAATTATCTGGAGTATGCAACCATGTTGGGCAAGAGTGTGATT  
ATGGACTGCAATGTCTTTAGTTCACCACCTGCCACCCTTAAGTGGAGAAGAGAAGACCCAGAGGGC  
TCTGTAGATGGAGAGAGATATTCTCTGCTGAAGAATGGCTCCCTGCAGATTCACAAAGTCGAGATG  
GAAGATATGGCCAGTACAAATGCTTGGCAAACAACCTCCGAGGGCTCTGCAAGCATCACCCTGAA  
CTTTTCATTAAAGATTCACCTAGGATCGTGGAGGCTCCTCAAGACATGAAGGTCATCCGGGGATCTG  
TGGCCGAGCTGGAGTGCCAGGTGGAGTGCACCCGCTCTGAGAAGAGAGCTGGAGTTCGTTTG  
GCTCAAAGATGGGATAAATATCCTCTCGAACTCCTCAGAAAGGTATTTTACAGATGAAGGAATTCTT  
CAGATATTCAACGTGAGTCACAGTGATCAAGGGAATTACACCTGTATTGTTTGAACATCCCTGGACC  
AAGATACAGCTTCTGCATACATAACAGTCTTAGATGTCCCCGATCCTCCGGTTGAATTATTGCTCAGT  
GATCTGAAAGACCGCAGTGTGAAGCTCCACTGGGTGAACACCAGTGATCACAACAGTCCATAACA  
GAGTTCATCATCCAGTACGAAGAGAGCCACTGGGAGCCAGAGAAGTGGAAAGATCTTCTTCGAGT  
GTCTAGCAGGAAGTTCTCAGCCCCCTGGCTCTGTAAGTCCACATTAACCTACCAGTTCAGAGTCATCG  
CTGTCAATGAAATAGGGAGAAGTCATCCCAGTATGCCCTCAGGAAGATATAAAAACCTCCATGTGC  
TCCTGACAGGAACCCAGAAAACATTAAGATTGAGGGTCACTGCCACATCAGATGGACATCAGCTG  
GGAGCCGCTCTTGCCGGTGGAGCACAACGGTCCCGGTCTGGAATACAAACTGAGCTACAGGCTCCT  
GGGTGTGAGGACAGTTGGAAAGAGCAGATGGTAAAGAGACACTCTTTTGTGGTGCAGACACC  
CCGACATTCGTCCCCTATGAAGTCAAATCCAGGCCTTCAACCGCCACGGCTGGGCACCAGGACCC  
AAAGTGGTGACTGGTTATTCTGGGGAAGACTTGCCCTGGTGGCTCCCGATAACGTATCTGCGGAG  
GTGTTGAACTCTACACTGCTGAAGGTGAGTGGTACCAGTGCCCCAAACCACCTGAGGGGCCAT  
CTTGAGGATACACAGTGAACACTGGCAAACCTCAGAGTCTGTTGACCTCTAAGAAAATTCCCTCA  
GAGAGACAGTCTCTACCATCCCTGGAAACAGGAGTACACCATGGTGCCAGGACTGAAACCATT  
TCTGAATATAGTCTGACTGTCAACGTCTTTAACGGAGAGGGAATGGGCCCAAGCAGCAGTCCCA  
TCTCTTTCACAACTCCACAAGGGAGTTCCTGAACAACCTCATAACCTGAAAGCCACAAACTTTCAGA  
AAGACGCCATCACACTGGTGTGGGCGCCTCCGCACGAAACCAACGGCCATCTCACAGGATACCTTC  
TGCAATACCAAACAGTTGTAGATAATGAGACTCTGGGTGAGTGAACCTCTGTGAACATCTCTGGAG  
CAGACACGACACAGTGGGTTTTGCGTGATCTGCAGGAAGACAACCTCATATAAGTTCTACCTGAGTG  
CGTGACGCAGGTGGGCTGTGGTCCAGCATCAGTGAGAAAGGAGGCACCGACCCTGCAGCATCT  
TCTAGCAGACAAGAGATGGGATCTCAGGAGTGGTTTGGGGATGATGTGCGCGGTGGCTTTGCT  
AACTCTGCTTGCCTCATCGGCTGTTTTGTGCTCAAGAACAAAGGTGGCAAATACGCAGTAAAGGA  
AAAGGAGAACATTCCAGCTGATCCTGAATCTCATGGCATGGATGAAGAAACACCCTGTGAATACAG  
TGACAATGATGAGAAGCCGCTGAAGAGCAGCCAGCAATTGTTCCGAGACGCCACAGAGGATGATC  
GCAGTGAGGATAGCTCTGAGATATCAGAGGATGATGACTGCGAGTTCAATGAAGATGGGTCAATCA  
TTGGTGAATACTCTGGGTACATGCGCAGGACGTCCACGGCGGTCAACGGATTGAATGGACATACCC  
CAGGAACTTCTTAAACAGTGGCCCAATTTTATGAACTTTTAAACAATTCAACAGTAAGAAAGGTTTTG  
TTTGAATGGTGTGCCATGAATGTGCCTATGCTTCTGCGTGATTGGGCCAGTTTTTCTACAGTATTAATAT  
GAAGGTTGAAAATTTATGATTCTGCGCAA

**Notes: The sequence and diagram are color-to-color matching**



# The protein sequence of camel isoforms

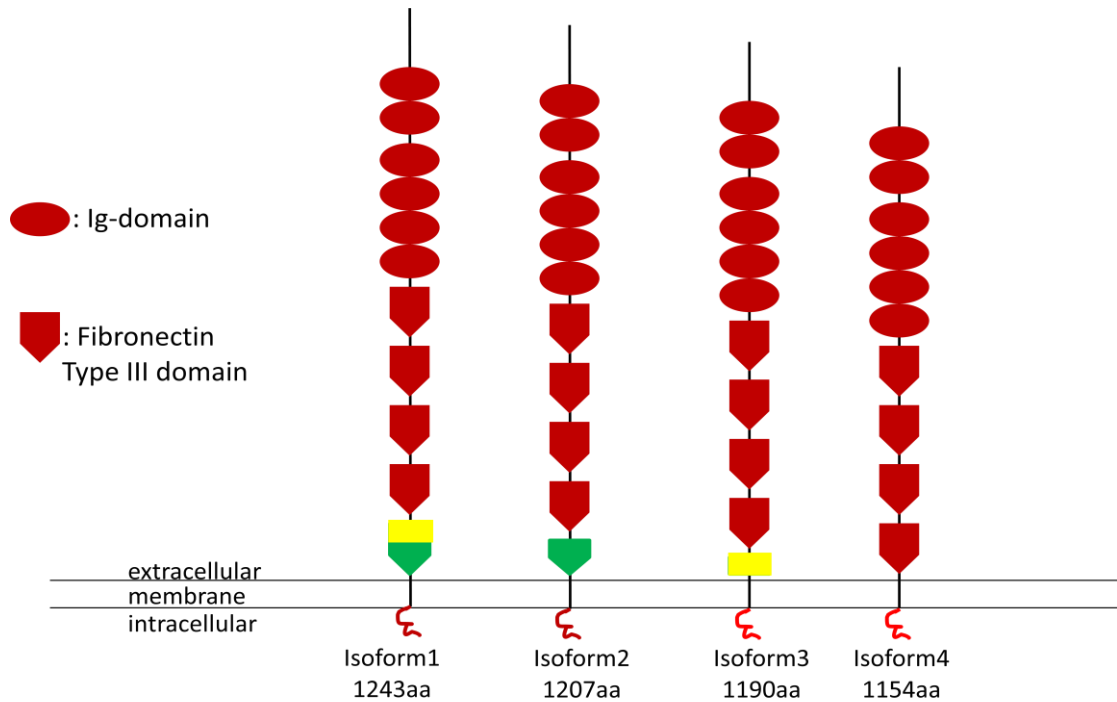

## Isoform 1 protein sequence 1243aa

MRGLRSLVGLLSAFFSTTFGLYFPPHVEQLPTITAQTSGTIIALPYDERYIFKCEAKGNRPRTFRWTKDGM  
 DFDPHKDPQVTTEENTGTFEIPNKKDKVKYQGKYRCYASNKLGTATSEEAEFIVPMVPKFKPEKIEPIVVTE  
 GDSVVLNPPQGIIPWQLYWMTNDRHIEQNERVSMGLSGNLYFSNTLVSDSHDDYCCFASFFKIRTI  
 VQKPRMVLKVPVDAKQEDGDAKIVQERKPSILVPSHSTTFLKKGEELEECIAEGLPTPEVEWIKIWD  
 LPKRTQIKNFGKLLTIPNIREEDEGKYMCKAKNQHGEDVHHFQVEVEPPSWQKEPLKSQLAWIGSDIHI  
 NCSATGKQPQTITWKRNGKPLDDFPSTHHKMLDDRIIILKAEQKDTAVYQCEASNKHGSLLANANVLM  
 NHPPLILTRNLEYATMLGKSVIMDCNVFSSPATLNWRREDPEGSVDGERYSLLKNGSLQIHKVEMED  
 MGQYKCLANNSEGSASITTELFIKDSTRIVEAPQDMKIVIRGSVAELECQVECDPSLRRELEFVWLKDGINI  
 LNSSERYFTDEGILQIFNVSHSDQGNVTCIVRTSLDQDTASAYITVLDVDPPEVLLSLLKDRSVKLVHWV  
 NTS DHNSPITEFIIQYEESHWPEKWKDLLRVSSRKFSAPLALYCHINYQFRVI AVNEIGRSHPSMPSGRYK  
 TPPCAPDRNPENIKIEGHLPHQMDISWEPLLPVEHNGPGLEYKLSYRLLGVEDSWKEQMVKRHSFVVR  
 DTPTFPYEVKIQAFNRHGWAPGPKVVTGYSGEDLPLVAPDNVSAEVLNSTLLKVSWSVPVQTTLRGHL  
 GGYTVNYWQTQSLTSSKIPSERQSLTIPGNRSHTMVPGLKPFSEYSLTVNVFNRRGNGPQAAVPSLSQL  
 HKGVPEQPHNLKATNFQKDAITLVWAPPHTNGHLTYLLQYQTVVDNETLGELNSVNISGADTTQWV  
 LRLDQEDNSYKFYLSACTQVGCESAISEKGGTDPAAFV LNVSTFVRDTSARISWRTRGEHSDS QLYVAIM  
 NHRDGIWQLSEALNTSKGFHLVEGLSPGTVYTVRLQASRRVGVPSIFEEVFKTRKASSRQEMGSQEFV  
 GMMCAVALLTLLVIGCFVLKNKGGKYAVKEKENIPADPESHGMDEETPCEYSDNDEKPLKSSQQLFRDA  
 TEDDRSDESSEISEDDECFNEDGSFIGEYSGYMRRTSTAVNGLNGHTPGTS

## Isoform 2 -proteins sequence 1207aa

---

MRGLRSLVGLLSAFFSTTFGLYFPPHVEQLPTITAQTSGTIIALPYDERYIFKCEAKGNPRPTFRWTKDGM  
DFDPHKDPQVTTEENTGTFEIPNKKDKVKYQGKYRCYASNKLGATSEEAEFIVPMVPKFPKEKIEPIVTE  
GDSVVLECNPPQGIPPWQLYWMTNDLRHIEQNERVSMGLSGNLYFSNTLVSDSHDDYCCFASFFKIRTI  
VQKPRMVLKVKPVDKQEDGDAKIVQERKPSILVSSHSTTFLLKKGEELEECIAEGLPTPEVEWIKIWD  
LPKRTQIKNFGKLLTIPNIREEDEGKYMCKAKNQHGEDVHHFQVEVEEPPSWQKEPLKSQLAWIGSDIHI  
NCSATGKQPPTITWKRNGKPLDDFPSTHHKMLDDRIILKAEQKDTAVYQCEASNKHGSLLANANVLM  
NHPPLILTRNYLEYATMLGKSVIMDCNVFSSPPATLNWRREDPEGSVDGERYSLLKNGSLQIHKVEMED  
MGQYKCLANNSEGSASITTELFIKDSTRIVEAPQDMKIVIRGSVAELECQVECDPSLRRELEFVWLKDGINI  
LSNSSERYFTDEGILQIFNVSHSDQGNVTCIVRTSLDQDTASAYITVLDVDPPEVLLSCLKDRSVKLVHW  
NTSDHNSPITEFIIQYEESHWEPEKWKDLLRVSSRKFSAPLALYCHINYQFRVIAVNEIGRSHPSMPSGRYK  
TPPCAPDRNPENIKIEGHLPHQMDISWEPLLPVEHNGPGLEYKLSYRLLGVEDSWKEQMVKRHSFVVR  
DTPTFVPEYVKIQAFNRHGWAPGPKVVTGYSGEDLPLVAPDNVSAEVLNSTLLKVSWSVPPQTTLRGHL  
GGYTVNYWQTQSLTSSKIPSERQSLTIPGNRSHTMVPGLKPFSEYSLTVNVFNRRNGPQAAVPSLSQL  
HKGVPPEQPHNLKATNFQKDAITLVWAPPHTNGHLLTGYLLQYQTVVDNETLGELNSVNISGADTTQWV  
LRDLQEDNSYKFYLSACTQVGCESAISEKGGTDPAACDGIWQLSEALNTSKGFHLVEGLSPGTVYTVRLQ  
ASRRVGVPSIFEEVFKTRKASSRQEMGSQEWVFGMMCAVALLTLVLIGCFVLKKNKGGKYAVKEKENIPA  
DPESHGMDEETPCEYSDNDEKPLKSSQQLFRDATEDDRSEDSSEISEDDCEFNEDGSGFIGEYSGYMRRT  
STAVNGLNGHTPGTS

### Isoform 3 protein sequence 1190aa

MRGLRSLVGLLSAFFSTTFGLYFPPHVEQLPTITAQTSGTIIALPYDERYIFKCEAKGNPRPTFRWTKDGM  
DFDPHKDPQVTTEENTGTFEIPNKKDKVKYQGKYRCYASNKLGATSEEAEFIVPMVPKFPKEKIEPIVTE  
GDSVVLECNPPQGIPPWQLYWMTNDLRHIEQNERVSMGLSGNLYFSNTLVSDSHDDYCCFASFFKIRTI  
VQKPRMVLKVKPVDKQEDGDAKIVQERKPSILVSSHSTTFLLKKGEELEECIAEGLPTPEVEWIKIWD  
LPKRTQIKNFGKLLTIPNIREEDEGKYMCKAKNQHGEDVHHFQVEVEEPPSWQKEPLKSQLAWIGSDIHI  
NCSATGKQPPTITWKRNGKPLDDFPSTHHKMLDDRIILKAEQKDTAVYQCEASNKHGSLLANANVLM  
NHPPLILTRNYLEYATMLGKSVIMDCNVFSSPPATLNWRREDPEGSVDGERYSLLKNGSLQIHKVEMED  
MGQYKCLANNSEGSASITTELFIKDSTRIVEAPQDMKIVIRGSVAELECQVECDPSLRRELEFVWLKDGINI  
LSNSSERYFTDEGILQIFNVSHSDQGNVTCIVRTSLDQDTASAYITVLDVDPPEVLLSCLKDRSVKLVHW  
NTSDHNSPITEFIIQYEESHWEPEKWKDLLRVSSRKFSAPLALYCHINYQFRVIAVNEIGRSHPSMPSGRYK  
TPPCAPDRNPENIKIEGHLPHQMDISWEPLLPVEHNGPGLEYKLSYRLLGVEDSWKEQMVKRHSFVVR  
DTPTFVPEYVKIQAFNRHGWAPGPKVVTGYSGEDLPLVAPDNVSAEVLNSTLLKVSWSVPPQTTLRGHL  
GGYTVNYWQTQSLTSSKIPSERQSLTIPGNRSHTMVPGLKPFSEYSLTVNVFNRRNGPQAAVPSLSQL  
HKGVPPEQPHNLKATNFQKDAITLVWAPPHTNGHLLTGYLLQYQTVVDNETLGELNSVNISGADTTQWV  
LRDLQEDNSYKFYLSACTQVGCESAISEKGGTDPAAFVNLNVSTFVRDTSARISWRTRGEHSDSQLYVAIM  
NHPSSRQEMGSQEWVFGMMCAVALLTLVLIGCFVLKKNKGGKYAVKEKENIPADPESHGMDEETPCEY  
SDNDEKPLKSSQQLFRDATEDDRSEDSSEISEDDCEFNEDGSGFIGEYSGYMRRTSTAVNGLNGHTPGTS

### Isoform 4 protein sequence 1154aa

MRGLRSLVGLLSAFFSTTFGLYFPPHVEQLPTITAQTSGTIIALPYDERYIFKCEAKGNPRPTFRWTKDGM  
DFDPHKDPQVTTEENTGTFEIPNKKDKVKYQGKYRCYASNKLGATSEEAEFIVPMVPKFPKEKIEPIVTE

---

GDSVVLECNPPQGIPPWQLYWMTNDRHIEQNERVSMGLSGNLYFSNTLVSDSHDDYCCFASFFKIRTI  
VQKPRMVLKVKPVDKQEDGDAKIVQERKPSILVSSHSTTFLKKGEELEECIAEGLPTPEVEWIKIWGD  
LPKRTQIKNFGKLLTIPNIREEDEGKYMCKAKNQHGEDVHHFQVEVEPPSWQKEPLKSQQLAWIGSDIHI  
NCSATGKPQPTITWKRNGKPLDDFPSTHHKMLDDRIILKAEQKDTAVYQCEASNKHGSLLANANVLM  
NHPPLILTRNYLEYATMLGKSVIMDCNVFSSPPATLNWRREDPEGSVDGERYSLLKNGSLQIHKVEMED  
MGQYKCLANNSEGSASITTELFIKDSTRIVEAPQDMKVIRGSVAELECQVECDPSLRRELEFVWLKGINI  
LSNSSERYFTDEGILQIFNVSHSDQGNVTCIVRTSLDQDTASAYITVLDVDPPEVLLLSDLKDRSVKLHWV  
NTSDHNSPITEFIIQYEESHWEPEKWKDLLRVSSRKFSAPLALYCHINYQFRVIAVNEIGRSHPSMPSGRYK  
TPPCAPDRNPENIKIEGHLPHQMDISWEPLLPVEHNGPGLEYKLSYRLLGVEDSWKEQMVKRHSFVVR  
DTPTFPYEVKIQAFNRHGWAPGPKVVTGYSGEDLPLVAPDNVSAEVLNSTLLKVSWSVPVQTTLRGHL  
GGYTVNYWQTQSLTSSKIPSERQSLTIPGNRSHTMVPGLKPFSEYSLTVNVFNRRGNGPQAAVPSLSQL  
HKGVPEQPHNLKATNFQKDAITLVWAPPHETNGHLLTYLLQYQTVVDNETLGELNSVNISSGADTTQWV  
LRDLQEDNSYKFYLSACTQVGCESAISEKGGTDPAAASSRQEMGSQEFVFGMMCAVALLTLLVLIGCFV  
LKNKGGKYAVKEKENIPADPESHGMDEETPCEYSDNDEKPLKSSQQLFRDATEDDRSEDSSEISDDCE  
FNEDGSFIGEYSGYMRRTSTAVNGLNGHTPGTS
